# Supplementary material for: MicroRNA-30a-5p promotes differentiation in neonatal mouse spermatogonial stem cells (SSCs)
Source: PubMed Central journal article supplement (PMC8188658; doi:10.1186/s12958-021-00758-5), 2021-06-09

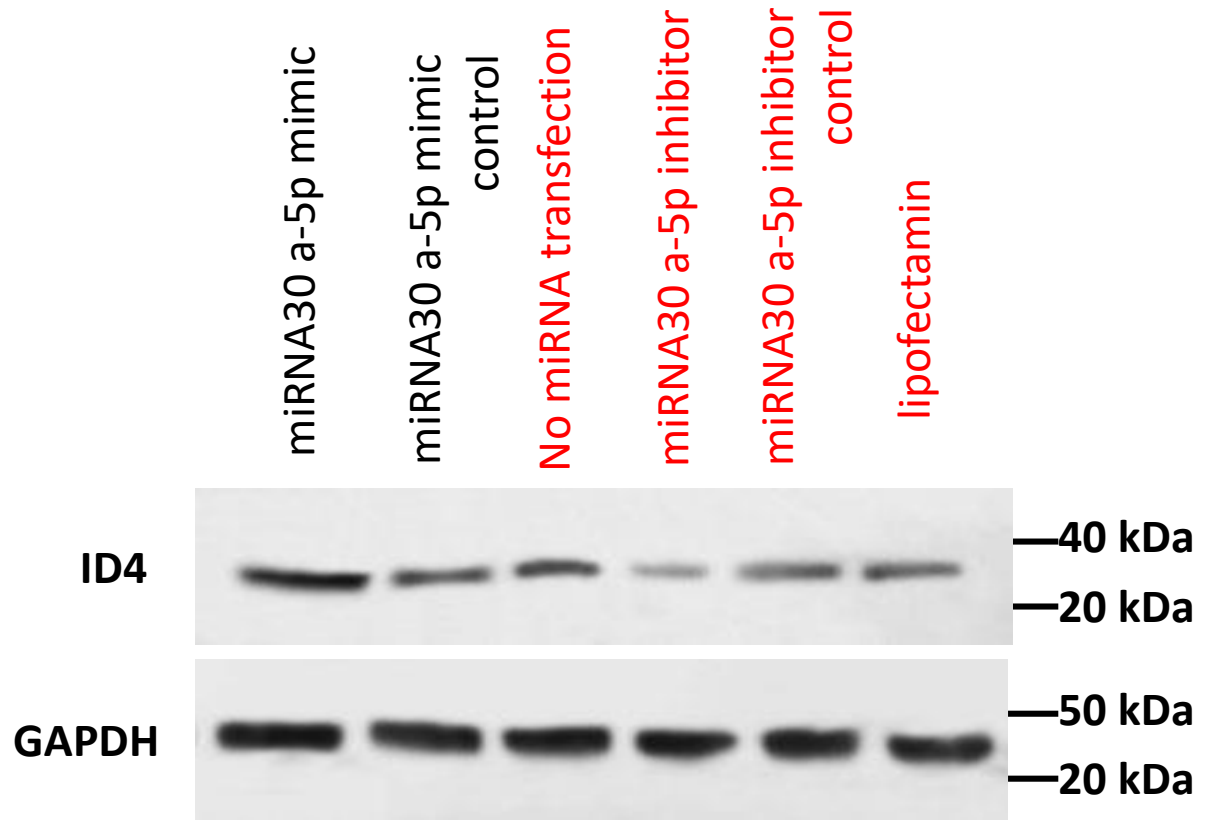

**ID4**

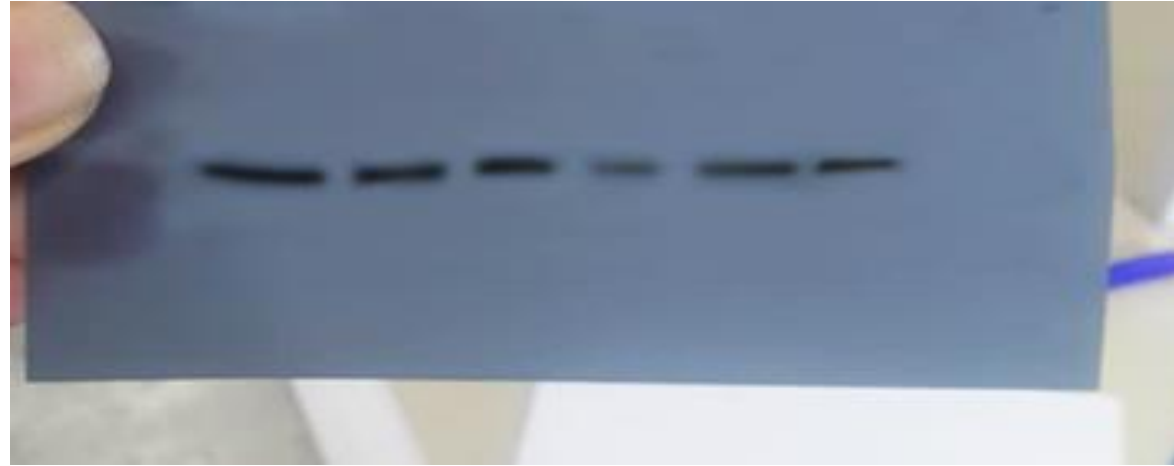

**GAPDH**

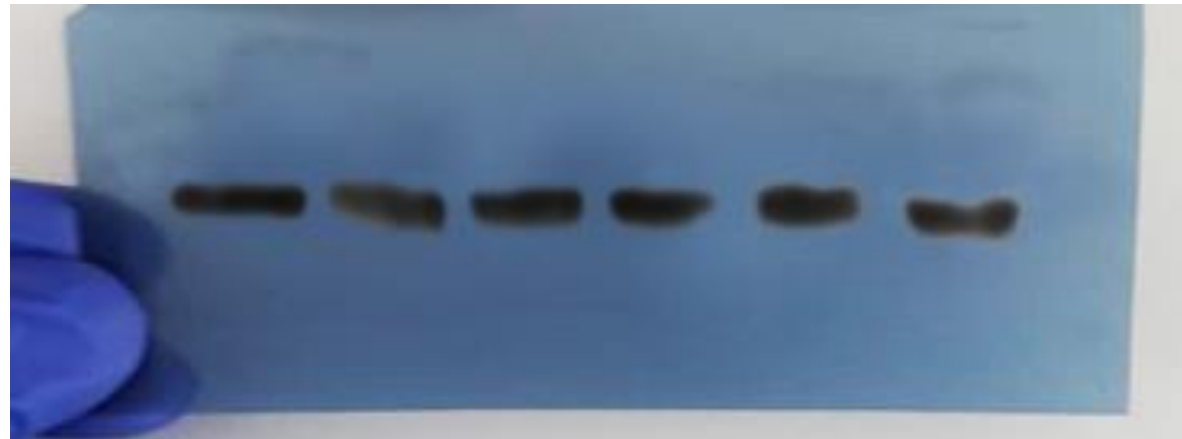

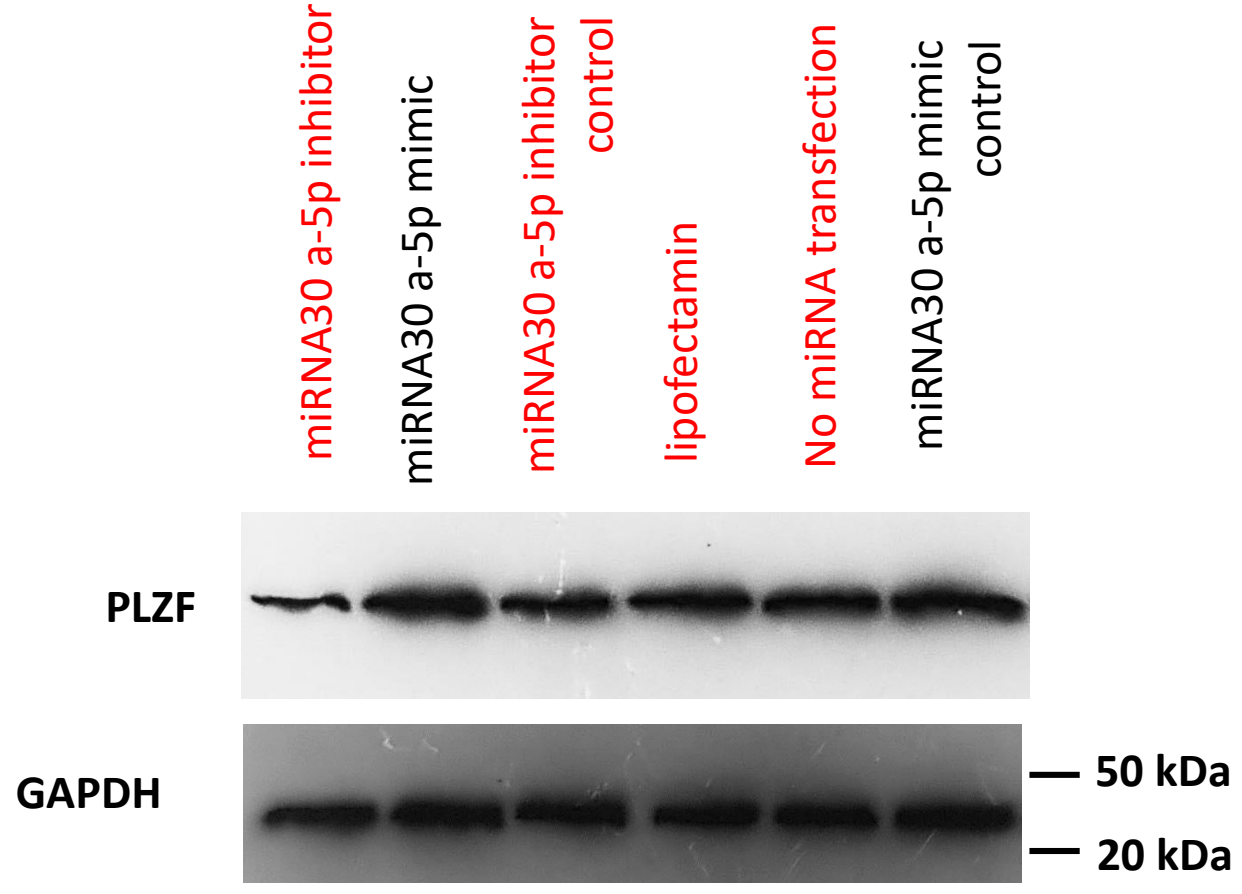

PLZF

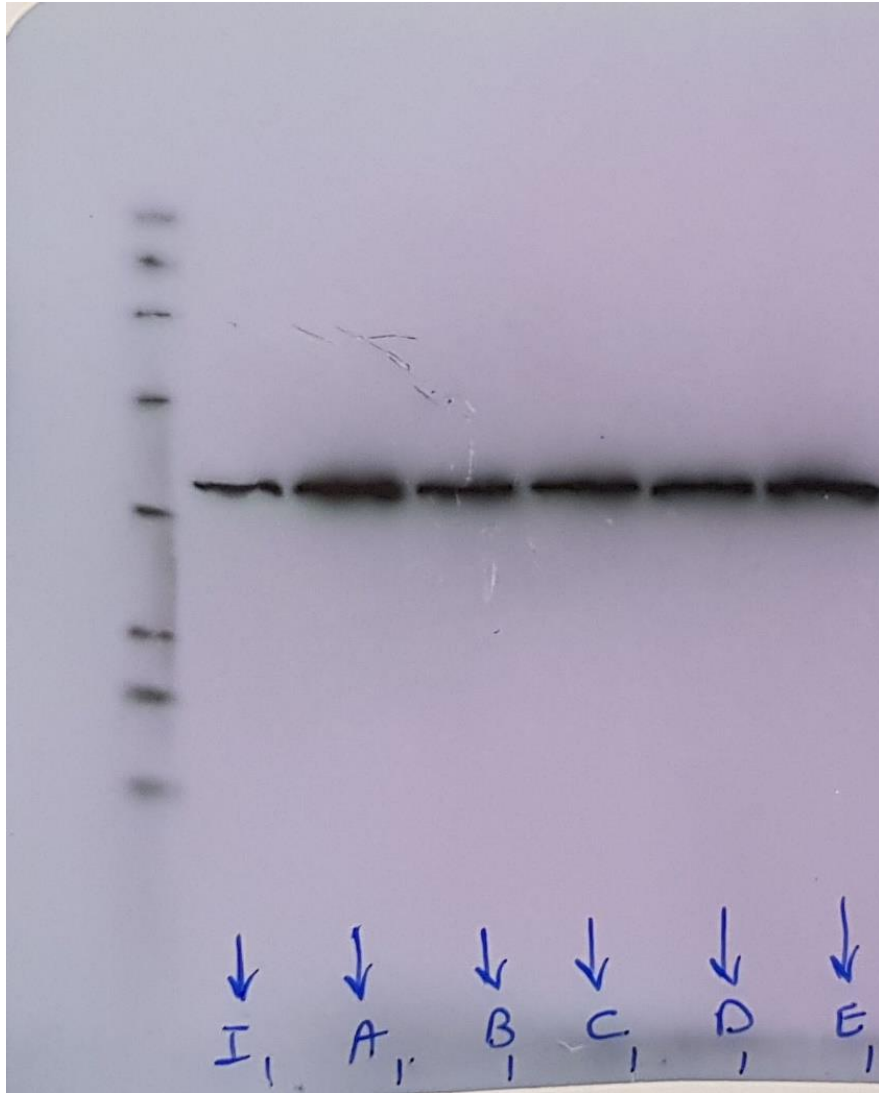

GAPDH

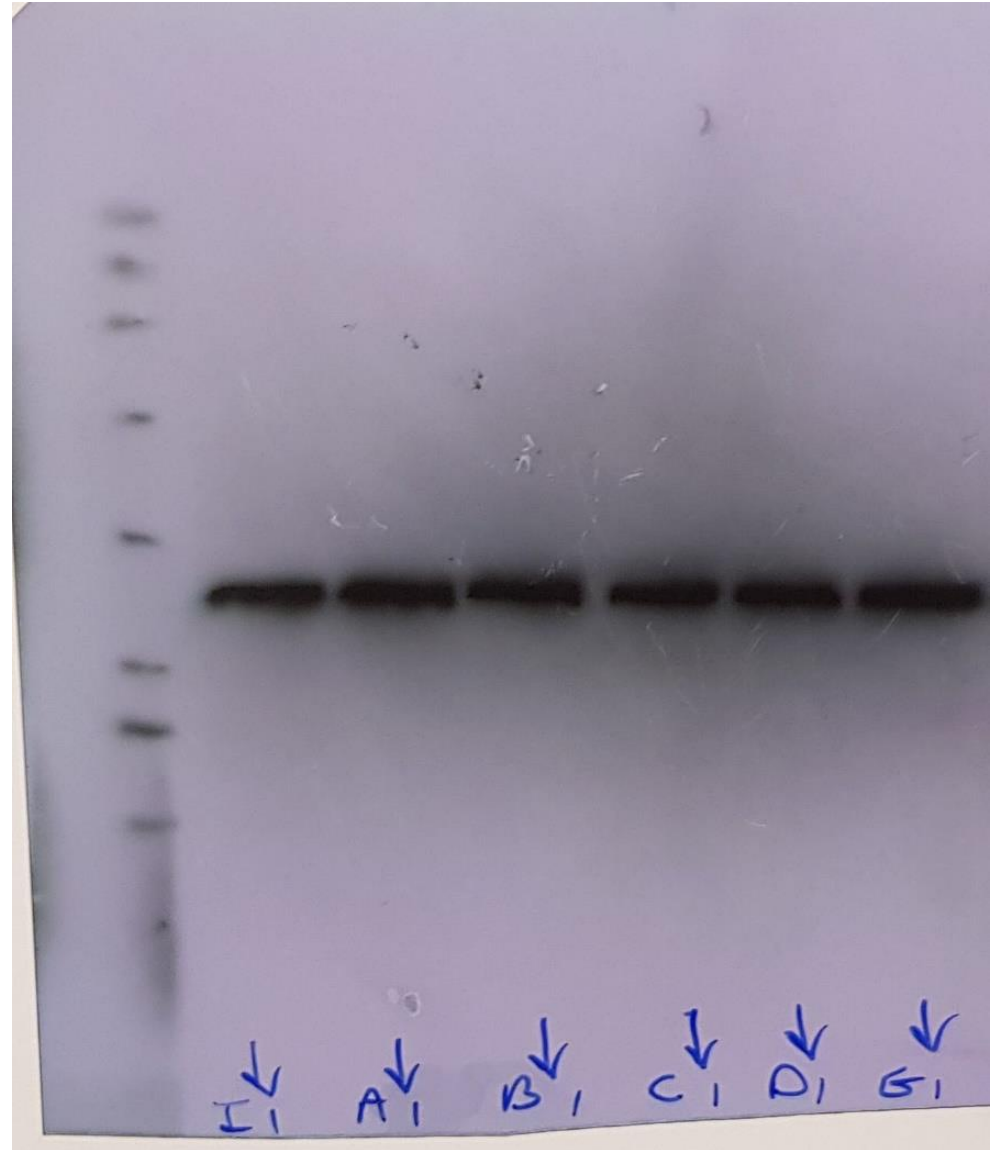



**GFR $\alpha$ 1**

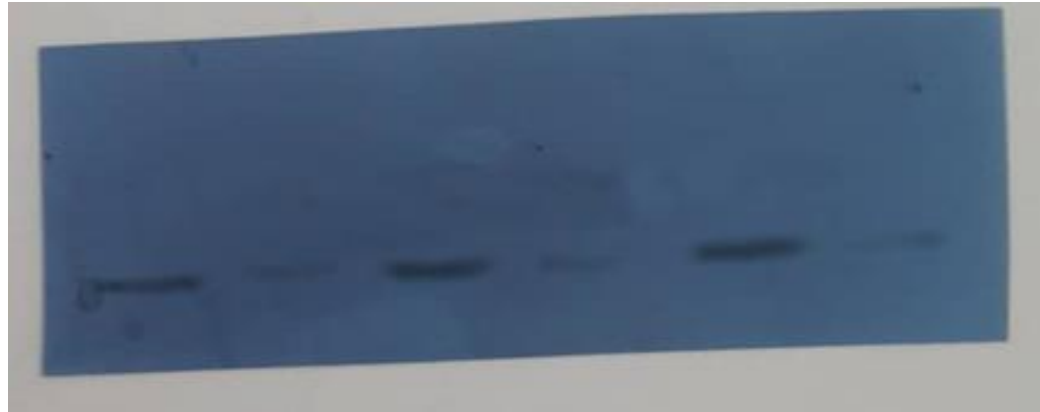

**GAPDH**

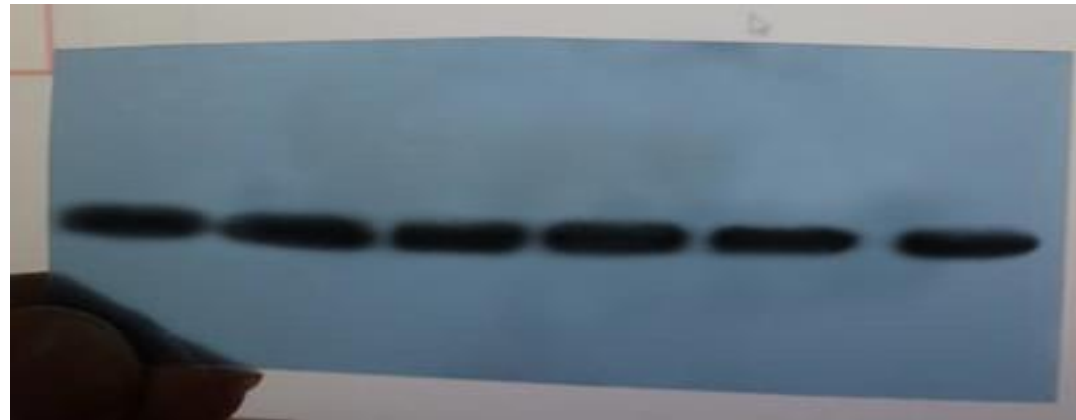

Supplement: 12958_2021_758_MOESM1_ESM.pdf [file 12958_2021_758_MOESM1_ESM.pdf]
